# Supplementary material for: Multiple mutations of SARS-CoV-2 Omicron BA.2 variant orchestrate its virological characteristics
Source: PubMed Central journal article supplement (PMC10781145; doi:10.1128/jvi.01011-23), 2023-10-05
Supplement: jvi.01011-23-s0002.pdf [file jvi.01011-23-s0002.pdf]

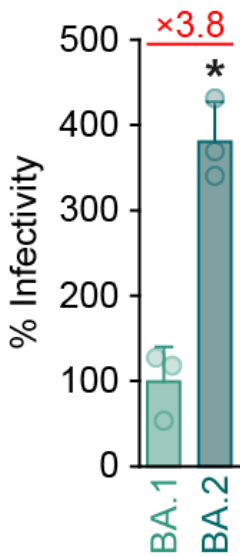

**Figure S2. Comparison of viral infectivity pseudotyped with BA.1 S and BA.2 S**

HOS-ACE2-TMPRSS2 cells were infected with pseudoviruses bearing each S protein. The amount of input virus was normalized based on the amount of HIV-1 p24 capsid protein. The percent infectivity compared to that of the virus pseudotyped with BA.1 S is shown. Assays were performed in triplicate. The presented data are expressed as the average  $\pm$  SD. Each dot indicates the result of an individual replicate. Statistically significant difference (\*,  $P < 0.05$ ) versus parental BA.1 was determined by a two-sided Student's *t* test. The red number indicates the fold change between BA.1 and BA.2.
